# Supplementary material
Source: PubMed Central journal article supplement (PMC5084897)
Supplement: ASN.2016010038SupplementaryData.pdf [file ASN.2016010038SupplementaryData.pdf]

# Length Polymorphisms in *Heme Oxygenase-1* and Risk of AKI following Cardiac Surgery

Leaf DE *et al.*

## SUPPLEMENTAL MATERIAL

Supplemental Figure 1.....2

Supplemental Figure 2.....3

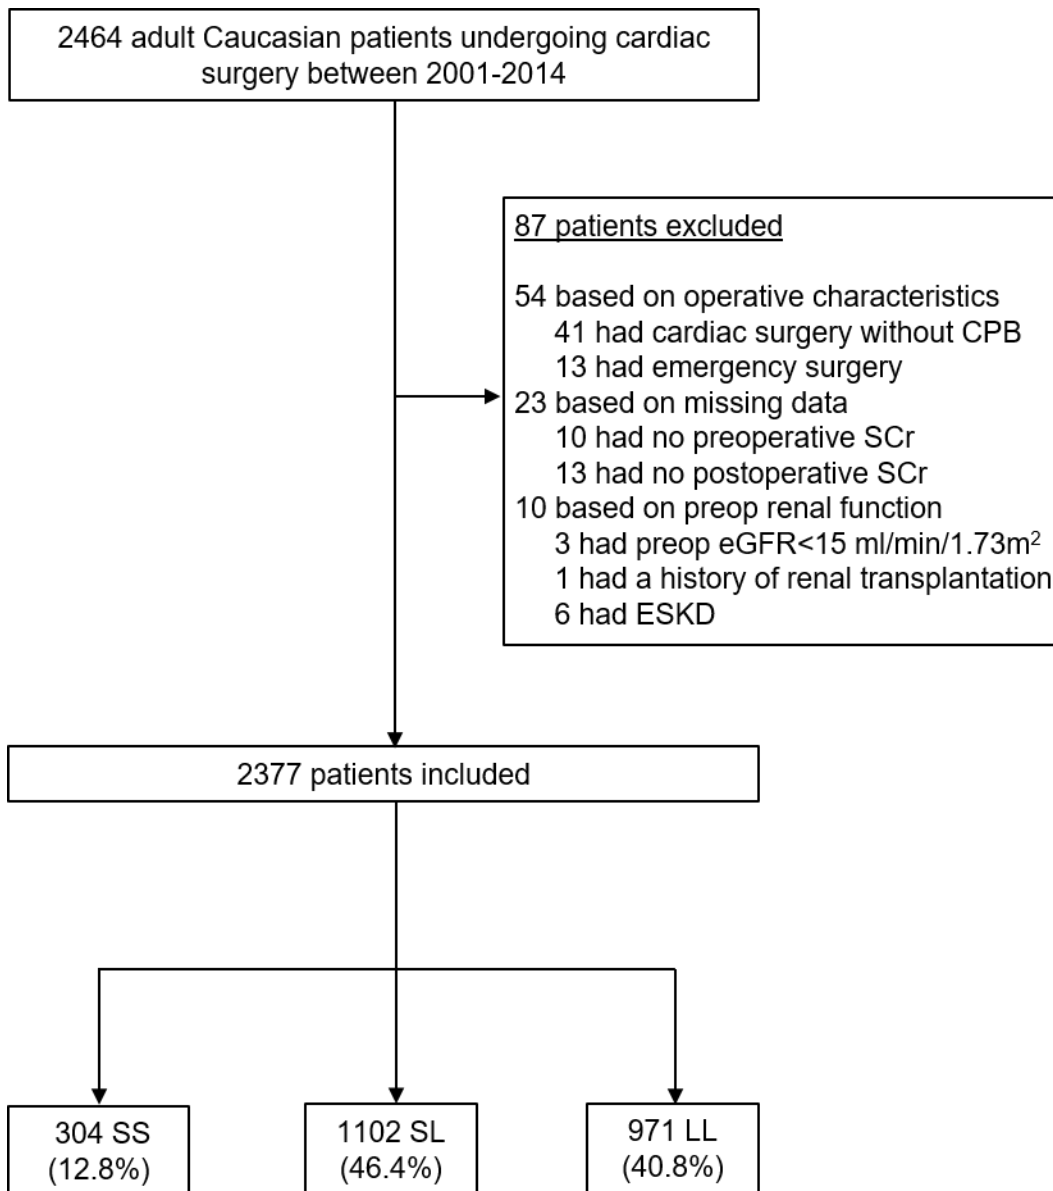

**Supplemental Figure 1. Flowchart.** The “S” allele represents a short (<27) number of (GT)<sub>n</sub> repeats, and the “L” allele represents a long (≥27) number of (GT)<sub>n</sub> repeats in the *HMOX1* gene promoter. Shorter repeats are associated with greater *HMOX1* mRNA expression and enzyme activity. Abbreviations: CPB, cardiopulmonary bypass; ESKD, end-stage kidney disease; SCr, serum creatinine.

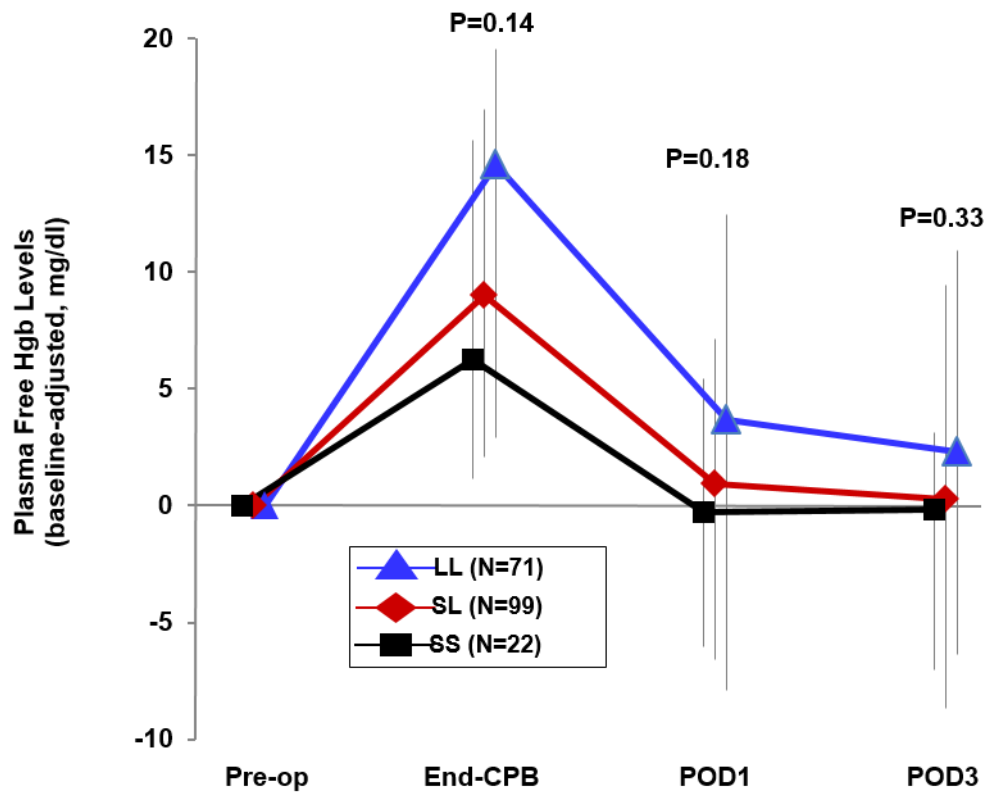

**Supplemental Figure 2. Plasma free hemoglobin levels by HO-1 genotype.** Data shown as median (IQR). Abbreviations: End-CPB, end of cardiopulmonary bypass; Hgb, hemoglobin; POD, postoperative day.
